# Supplementary material for: The neutrophil–osteogenic cell axis promotes bone destruction in periodontitis
Source: PubMed Central journal article supplement (PMC10899642; doi:10.1038/s41368-023-00275-8), 2024-02-27

a

> Mouse chr14: 78,3761,090...78,379,521 (GRCm38)

```

AAATGTTGCCATGAGGACCACATCATATTTGCCCTTGTACTGACTGAGATGTAGATGAGAGATGAGGGACCCTGAAGAGCATCCTT
GGGTTCCGAGATGGGAATTTGGTGGCTGATACATCCTGGACTTTGTTGTGTAACCTTCTGTTTAAACAATTGTATGCTGAGTCTTTTTG
TCCTAATATCTTAGCCTGTATCTTATCAAGTTCAAGTCTCTTTCTTAATTACAACTGGCTCCTATTACAGTAGCTTAAAAACAACCT
GTTTACTAATAGATGATGCTGGTTCATTTGGCTTGTACCCTGACTGAATGCTCAAATATGAACATGGAGGCAAGTTTGTGGCCG
GTTTGTACTTTCCAGCCTGCCTGATTTATTCACCTTGCCTCAGGTATCAGGTGATTTATGATGCCACTTTGTAGTTTATAGTC
CTCCATGGGCTGATGCATGTGGAGCCTTGGTCTCCAGCTGATGGAGCTGTTTTGAAAGTCAATAGGCTCTTAGGAGGTAGTGCCCTG
CTGGAGGAAGTGGTCAAGAGGATTCATATTTAGCCTCAGTGTATGTTGGCTCTCTAGTTCAGGTTGCATGAAAAATCTTCACTTC
CTCTGCACTAATATTTCCCTGGTAAATGGCTGGGCAAGTTAGCCACCCTTCTCCCTGCTTTTCAGTTTGGTAATGTAGCTT
ATTTTGAACCCCGGGATCTGGGTGGGTGACAGAGAAACACCATGTGTTTTGGTGGCTCACCTGGGCTCTGGTCTGCTCCATGA
AAGCAGGATGTTATAGGTCGATCTGACCCTGAAGTTTGGGCCAAGCTACAGCAGGTGACCCATAGACATTGGGAAAAGGGGAGAA
ACTTGGTGAAGACTAGTATTTGGAATTTGGTGTAGCATTAGAGCAGAGCTGATCAATATTTCCAATCCACTCTATTACATTAT
CTTTATCTCAGAAACATTAATAAAAAATACAAGAACCTTGAATTAAGGCAAAAGAAATCCCATATAATCTTATTCACAGATGAGCCTTAGG
CTTTTCTAGTGGCAGCCCAAGCTCCTGAAATATGACTTTGAGACTGAATTTATCATGAATAATGCCTAGCCATATAGTATGATGC
TCCCTCACTAGCTTGAACCTTAACTAACCCAAATATTCTATGAGTGAGTGGCCCATGGCTGTACCAAGTTCTGTTTCTTTGTGTG
TGTGTGTGTGTTGTGAGTGTATTTTATGGATTTTATTTATTTACATTTCAAATGTTGCTCTCAAAAAAACCCCTCTCCCA
CCCCACCCCAACCCCACTTCTATGAGGCTGCTCCCCACCCCAACCTTCCACTCTGCCCCTAGCATTCCCTACACTGG
GGCATCTAGCCTCATAGGATCAAAGCCCTCTCCCTCATTGATGATGACAAAGGCAATCTCTGCTACTTATGTGTTGGAGCTATGG
TGCCCTCCATGAGTACTCTTGGTGGTGGTTAGTCTGGGAGTTCTGGGTGCTTGGTGGTGTATGATTTGTTTCTCCTATGGGG
TTTCAAACCCCTTCACTCTCAGTCTTATCTAATCTCCTCATTGGGGTCCCGTGCATGTTATGTGCTGTTTCTCAGAGCTTG
GGGCTAATCTCCCCCAACCTGACTCTATCCAGAACTCCTCTCCTCCCTGCGGGAACCTCCCACTCTATTCTGCCTAAGTGAATG
GGCAACAGCTTTATTTGACAGATGTGGCTTACACACTATGCAAGAGATTCTCACTACACACAGAAAGCACCATTGCAGACATTCGT
GTTTTCTGGCCTTGTCTGGGCAATGACACAGCCATTCAATTTATCTTTATTCAGCAAAATACATTGGAGCTGCCTACTAAAAGCTA
GATGATTTACATACTGTACCAGGAGCCCTGTGGTCTGAGGCAAGCTTTATTCAGGGGAAAGATGGTGAAGCTGAACACAGAACATA
AAGCAGTTAAATGTTTCTCACAATCACTGAAGGAGCTAAGGGGAAATACAGCACACTAGGAAAAATTTAATCAGAGGGCACGATGAA
ATCTGGAGCCCGAAAAATTTCCATCCAGAAATATGCTAATATGATATTTTCAATATAATAAAATGTCCTGATTTATAATAACA
TGCCTAATTTTATACATTATCCACATAATATTTGGCTTTACACATGTAATATGCATATATATGAACACATTACTAGTATGTTCTC
TTTGATAAATGTGTAGATACATTTTATACCATCATCTATTTTTTGGCTATATCATAGTCCATTTAAATGCACATGTTATGTTTTGTCA
CCCCACCTTCTGGTATTAGACATTTAAATTTGCTTTTCAATGATTGGCCAGCATGCCAAGCTATGAACGGTCTGCTAAGTACTCTAATCTG
TTTGTGAAAGAAAAATAATGCAAGTAAATGAGAAAAATATGTGCTGTGAAGCAAAATTCCTATAGCCTCTCCTGACCTGTGTGTTCC
CGAAGGAAGCATAATGTCTGATTTATTTTGGATGAAATTTCTCATTACTGTCACTGAGTCACTCATTCTGAGGTTCTTCGGAGA
CAATTCAGCTTTTGTTCCTCCAGATGAAAGATTTTATGATGGCACACAGGGGAGAAAGCCAAAGGCAATGATACATGGATGAAAA
TAGACAAGGCTGCACATCACTCTGGTGTCTAGGGTCTCACTGCAGTGTGCTGCTGTGATACTGTGTTGTTGGTTCGTTGCTCCCT
GGTCAATACAGCCTCGTACTCTGAGGCCATTCCAAAAGCAACAACCTGAGTCTCCAGGAGAACCCAGGGGAGCTCAACTGAGT
GACGGGACTTTGAGATCGTCTGAATGAGAACCAAGTTTGAAGATAATGATGGGGTTGACATTTGTGTCACTGGAACACTCACTGCTG
ACATACTTCCCTCACATTTGATGCTAATGATGGGCTGCTTTGACGAAGGATGAACAAATTTGTTTGCATGGTCCCATGGTGTGAT
TCTATGATCTGGCAATTTGGCATTGCAAGATGGATGACTCTGTGCTTGTGGCTGACTATGAGGTAACCAAGAATTATGATCTC
TAGTGCACTTCTTCCATGAGTGCATCTTTGGATTGGCAGCCAGGAAATGAAGTAGATGGGGGGGAGGCTTTTCCCTTAA
AGATTCCTCATTATTCAGGTAATGAATGTGGGACAAGCATGTTTGAATTTGAGTCTACAATGCCTGTGGTCACTTAAATCAAGTGA
TGGTGAAGTGGCCCTGCTTGTGATCAT (3 412 bp deletion)

```

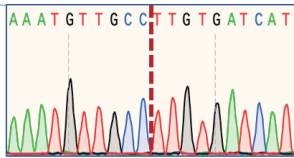

RL-D4-KO

b

WT

RL-D4-KO

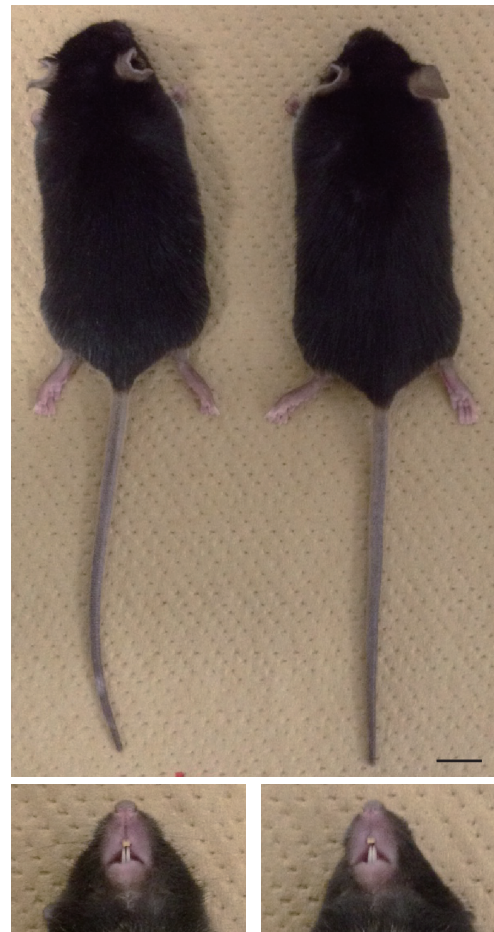

Supplement: 41368_2023_275_MOESM3_ESM.pdf [file 41368_2023_275_MOESM3_ESM.pdf]
