# Supplementary material for: The neutrophil–osteogenic cell axis promotes bone destruction in periodontitis
Source: PubMed Central journal article supplement (PMC10899642; doi:10.1038/s41368-023-00275-8), 2024-02-27
Supplement: 41368_2023_275_MOESM1_ESM.pdf [file 41368_2023_275_MOESM1_ESM.pdf]

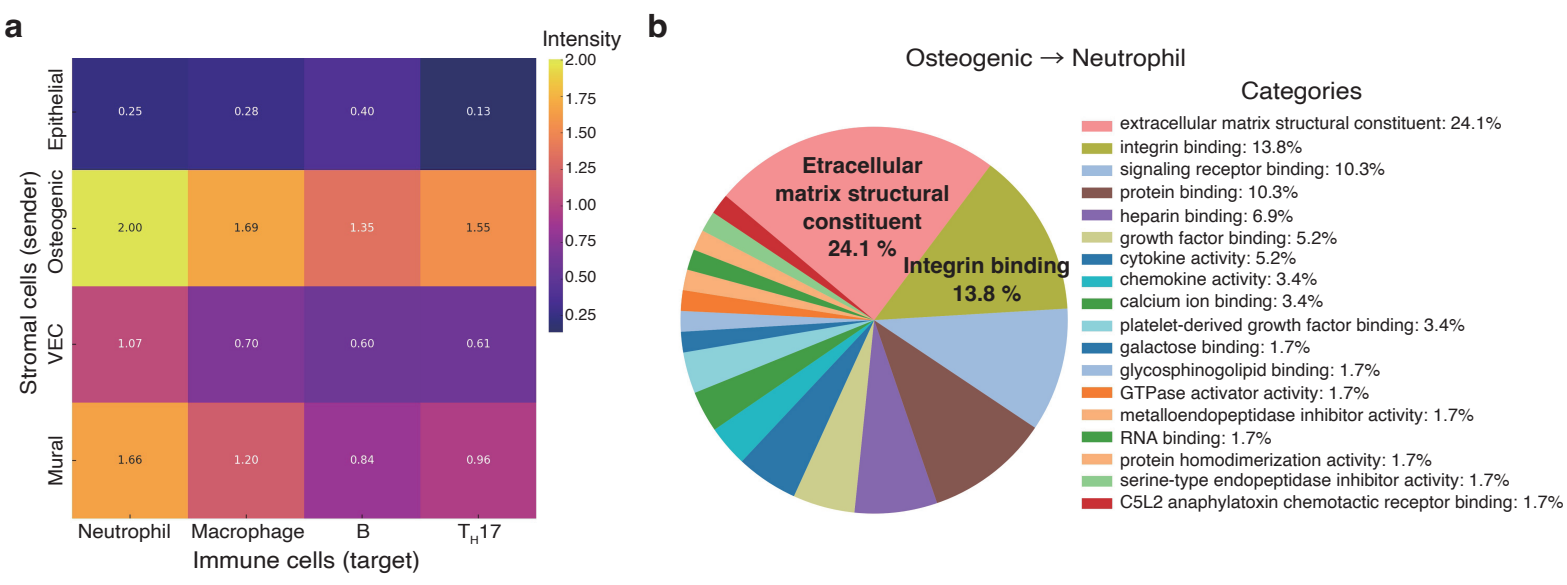

Supplementary Figure 1
